# Supplementary material for: Cyclic stretch modulates the cell morphology transition under geometrical confinement by covalently immobilized gelatin
Source: Royal Society of Chemistry journal article supplement (doi:10.1039/d3tb00421j), 2023-01-01
Supplement: d3tb00421j1.pdf [file d3tb00421j1.pdf]

## Supplementary Information

### Cyclic stretch modulates cell morphology transition under geometrical confinement by covalently immobilized gelatin

Kun Fang<sup>1,2</sup>, Stefan Müller<sup>3,4</sup>, Motoki Ueda<sup>1,4</sup>, Yasuhiro Nakagawa<sup>2</sup>, Katsuko Furukawa<sup>5</sup>, Takashi Ushida<sup>3,5</sup>, Toshiyuki Ikoma<sup>2</sup>, Yoshihiro Ito<sup>1,2,4\*</sup>

1. Nano Medical Engineering Laboratory, RIKEN Cluster for Pioneering Research, Saitama 351-0198 Japan,
2. Graduate School of Material Science and Engineering, Tokyo Institute of Technology, Tokyo 152-8550, Japan,
3. Graduate School of Medicine, The University of Tokyo, Tokyo, 113-0033, Japan,
4. Emergent Bioengineering Materials Research Team, RIKEN Center for Emergent Matter Science, Saitama, 351-0198, Japan
5. Graduate School of Engineering, The University of Tokyo, Tokyo, 113-0033, Japan,

\* Corresponding to [y-ito@riken.jp](mailto:y-ito@riken.jp)

# 1. Method of morphology analysis

## (a) Parameter setting

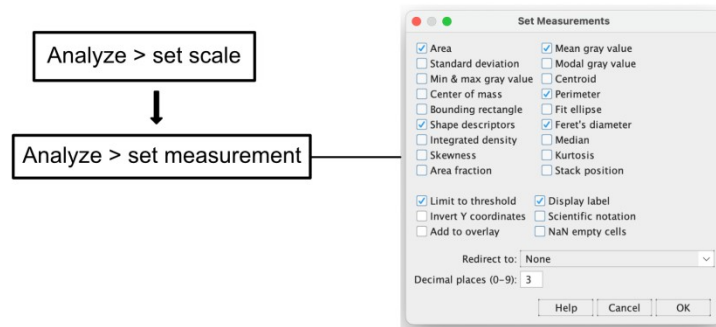

## (b) Measurement

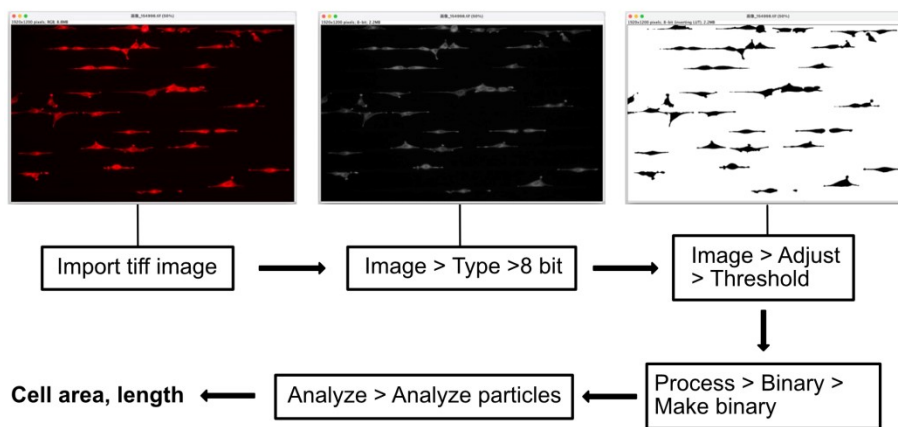

**Figure S1** The process of morphology quantification of fluorescently stained cells.

## 2. Ultraviolet–visible spectra

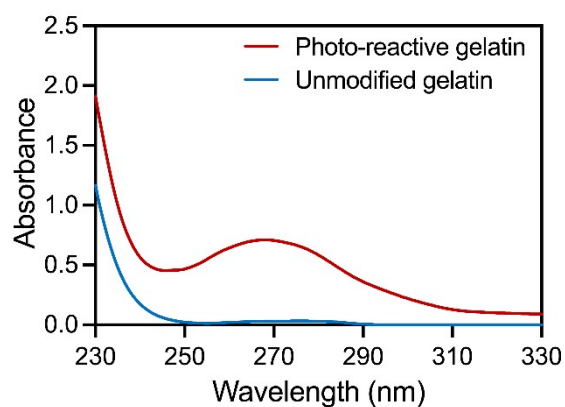

**Figure S2.** UV absorbance spectra of unmodified gelatin and photo-reactive gelatin. The concentration was 1 mg/mL.

## 3. Photo-reactive crosslinking

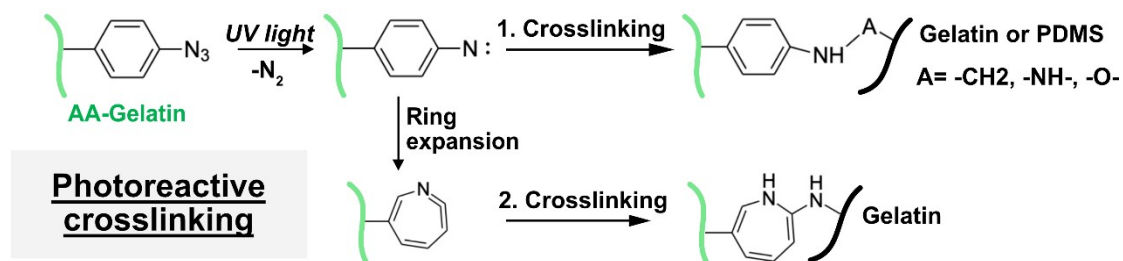

**Figure S3.** A possible mechanism of photo-reactive crosslinking of modified gelatin.
